# Supplementary material for: Do Observed Teaching Behaviors Relate to Students’ Engagement in Physical Education?
Source: MDPI journal article supplement (doi:10.3390/ijerph18052234), 2021-02-24
Supplement: s1 [file s1]

## Supplementary

Table S1. Teaching Behaviors and students' engagement observation tool.

| Items                                                                                                                           | Variables                     |
|---------------------------------------------------------------------------------------------------------------------------------|-------------------------------|
| 1. The students pay attention during this PE class                                                                              | Engagement                    |
| 2. The students put effort in the activities and exercises                                                                      | Engagement                    |
| 3. The students ask questions about the exercises                                                                               | Engagement                    |
| 4. The students don't give up easily during challenging tasks                                                                   | Engagement                    |
| 5. The students seem to enjoy this PE class                                                                                     | Engagement                    |
| 6. The teacher offers choice to all students                                                                                    | Autonomy support              |
| 7. The teacher gives students the opportunity to practice independently and to solve problems on their own, without interfering | Autonomy support              |
| 8. The teacher applies differentiation                                                                                          | Autonomy support              |
| 9. The teacher offers the students a rationale for tasks and exercises                                                          | Structure before the activity |
| 10. The teacher gives an overview of the content and structure of the lesson                                                    | Structure before the activity |
| 11. The teacher gives clear (verbal) instructions                                                                               | Structure before the activity |
| 12. The teacher provides variation in exercises or within exercises                                                             | Structure before the activity |
| 13. The teacher demonstrates the tasks himself, is a 'model' for the students                                                   | Structure before the activity |
| 14. The teacher offers the students a rationale for tasks and exercises                                                         | Structure during the activity |
| 15. The teacher monitors if the students consequently live up to the (verbal) instructions                                      | Structure during the activity |
| 16. The teacher offers students (apart from instruction) new guidelines, tips and advice during the exercises                   | Structure during the activity |
| 17. The teacher provides positive feedback                                                                                      | Structure during the activity |
| 18. The teacher uses students as positive role models                                                                           | Structure during the activity |
| 19. The teacher offers help during exercises                                                                                    | Structure during the activity |
| 20. The teacher addresses students by their first name when the opportunity occurs                                              | Structure during the activity |
| 21. The teacher is physically nearby the students                                                                               | Relatedness support           |
| 22. The teacher is enthusiastic and eager                                                                                       | Relatedness support           |
| 23. The teacher puts effort and energy into the lesson                                                                          | Relatedness support           |
| 24. The teacher takes the perspective of students into account, is empathic                                                     | Relatedness support           |
| 25. The teacher pays attention to what the students are saying                                                                  | Relatedness support           |
| 26. The teacher exercises power over the students by interfering and demanding respect                                          | Controlling                   |
| 27. The teacher commands students, uses controlling language and imperatives                                                    | Controlling                   |
| 28. The teacher is irritated, loses his patience                                                                                | Controlling                   |
| 29. The teacher yells at the students                                                                                           | Controlling                   |

---

|     |                                                                                                                                     |             |
|-----|-------------------------------------------------------------------------------------------------------------------------------------|-------------|
| 30. | The teacher pressures the students by making an appeal to their self-confidence or pride or induces feelings of guilt and shame     | Controlling |
| 31. | The teacher uses destructive criticism when students not acting in the way the teacher expects them to                              | Controlling |
| 32. | The teacher does not allow input from the students or reacts negatively to their input                                              | Controlling |
| 33. | The teacher does not pay much attention to the students                                                                             | Cold        |
| 34. | The teacher is acting unfriendly and cold                                                                                           | Cold        |
| 35. | The teacher takes distance from the students, is detached                                                                           | Cold        |
| 36. | The teacher is distracted by activities not related to the students or the content of the lesson                                    | Cold        |
| 37. | The teacher is acting inconvenient and annoying towards students                                                                    | Cold        |
| 38. | The teacher loses time with the reorganization of groups, equipment...                                                              | Chaotic     |
| 39. | The teacher doesn't know the students' names                                                                                        | Chaotic     |
| 40. | The teacher allows chaos, and leaves the students to it                                                                             | Chaotic     |
| 41. | The teacher uses an illogical and inconsistent structure during the warming up and activity or in the transitions between exercises | Chaotic     |

---
